# Supplementary material
Source: Elsevier journal article supplement (https://www.sciencedirect.com/science/article/pii/S0300893219305391)

## Impacto de la anticoagulación en los pacientes con demencia y fibrilación auricular. Resultados del registro CardioCHUVI-FA

## MATERIAL SUPLEMENTARIO

Tabla 1

Diferencias en las características basales de la población total en función de los eventos (mortalidad, embolias y sangrados)

| Características basales     | Muerto<br>(n = 1.400) | Vivo<br>(n = 2.149) | p       | Embolias<br>(n = 348) | No embolias<br>(n = 3.201) | P     | Sangrados<br>(n = 3.034) | No sangrados<br>(n = 515) | p       |
|-----------------------------|-----------------------|---------------------|---------|-----------------------|----------------------------|-------|--------------------------|---------------------------|---------|
| Edad (años)                 | 89,5 ± 3,7            | 88,4 ± 2,8          | < 0,001 | 88,9 ± 3,5            | 88,9 ± 3,2                 | 0,801 | 89,2 ± 3,3               | 88,8 ± 3,2                | 0,024   |
| Sexo femenino (%)           | 66,0%                 | 67,9%               | 0,241   | 74,4%                 | 66,4%                      | 0,002 | 60,8                     | 68,2                      | 0,001   |
| Hipertensión arterial (%)   | 61,9%                 | 66,4%               | 0,006   | 63,8%                 | 64,8%                      | 0,720 | 68,0                     | 64,1                      | 0,091   |
| Diabetes (%)                | 16,7%                 | 19,7%               | 0,026   | 15,5%                 | 18,8%                      | 0,130 | 18,1                     | 18,6                      | 0,774   |
| Cardiopatía isquémica (%)   | 17,9%                 | 14,5%               | 0,007   | 14,4%                 | 16,0%                      | 0,421 | 17,3                     | 15,6                      | 0,341   |
| Insuficiencia cardíaca (%)  | 19,4%                 | 10,0%               | < 0,001 | 13,8%                 | 13,7%                      | 0,955 | 13,6                     | 13,7                      | 0,942   |
| Infarto cerebral previo (%) | 12,6%                 | 8,8%                | < 0,001 | 13,2%                 | 10,0%                      | 0,058 | 10,3                     | 10,3                      | 0,996   |
| Hemorragia previa (%)       | 4,2%                  | 5,6%                | 0,047   | 4,3%                  | 4,8%                       | 0,677 | 8,0                      | 4,2                       | < 0,001 |
| Anemia (%)                  | 28,1%                 | 43,1%               | < 0,001 | 32,8%                 | 34,1%                      | 0,612 | 38,3                     | 33,3                      | 0,027   |
| Demencia (%)                | 9,4%                  | 4,2%                | < 0,001 | 6,9%                  | 6,2%                       | 0,586 | 5,8                      | 6,3                       | 0,683   |
| EPOC (%)                    | 11,7%                 | 9,7%                | 0,053   | 8,0%                  | 10,7%                      | 0,118 | 10,3                     | 10,5                      | 0,879   |
| FEVI ≤ 40%                  | 5,4%                  | 3,7%                | 0,016   | 3,2%                  | 4,5%                       | 0,256 | 3,5                      | 4,5                       | 0,309   |

|                                                 |             |             |         |             |             |        |             |             |         |
|-------------------------------------------------|-------------|-------------|---------|-------------|-------------|--------|-------------|-------------|---------|
| Hemoglobina (g/dL)                              | 12,5 ± 1,8  | 13,1 ± 1,5  | < 0,001 | 12,9 ± 1,7  | 12,8 ± 1,6  | 0,471  | 12,7 ± 1,9  | 12,9 ± 1,6  | 0,023   |
| CKD-EPI (ml/min/1,73 m <sup>2</sup> )           | 56,4 ± 18,8 | 60,9 ± 16,0 | < 0,001 | 57,8 ± 17,3 | 59,3 ± 17,3 | 0,139  | 58,7 ± 18,1 | 59,2 ± 17,2 | 0,538   |
| Fibrilación auricular de novo (%)               | 5,4%        | 37,2%       | < 0,001 | 11,5%       | 26,1%       | <0,001 | 13,2        | 26,6        | < 0,001 |
| CHA <sup>2</sup> DS <sup>2</sup> -VASc (puntos) | 4,2 ± 1,4   | 4,0 ± 1,2   | 0,003   | 4,2 ± 1,3   | 4,1 ± 1,2   | 0,109  | 4,1 ± 1,3   | 4,1 ± 1,2   | 0,712   |
| HAS-BLED (puntos)                               | 2,9 ± 1,0   | 2,7 ± 1,1   | < 0,001 | 2,7 ± 1,1   | 2,8 ± 1,0   | 0,607  | 2,9 ± 1,0   | 2,7 ± 1,0   | 0,078   |
| Anticoagulación oral (%)                        | 61,4%       | 77,4%       | < 0,001 | 64,1%       | 71,8%       | 0,002  | 81,7        | 69,2        | < 0,001 |
| Antiagregación (%)                              | 28,6%       | 14,1%       | < 0,001 | 25,9%       | 19,2%       | 0,003  | 16,3        | 20,4        | 0,031   |
| Bloqueadores beta (%)                           | 26,9%       | 28,8%       | 0,224   | 28,2%       | 28,1%       | 0,966  | 29,3        | 27,9        | 0,493   |
| Digoxina                                        | 21,0%       | 11,3%       | < 0,001 | 19,0%       | 14,7%       | 0,034  | 16,9        | 14,8        | 0,220   |
| IECA/ARA-II                                     | 42,5%       | 41,8%       | 0,694   | 36,8%       | 42,7%       | 0,034  | 46,2        | 41,4        | 0,041   |
| Estatinas                                       | 23,8%       | 31,5%       | < 0,001 | 30,2%       | 28,3%       | 0,563  | 25,8        | 28,9        | 0,148   |
| IBP                                             | 50,6%       | 42,6%       | < 0,001 | 50,9%       | 45,2%       | 0,045  | 47,6        | 45,5        | 0,379   |

ARA-II: antagonista del receptor de la angiotensina II, CHA<sub>2</sub>DS<sub>2</sub>-VASc, insuficiencia cardiaca congestiva, hipertensión, edad ≥ 75 años [doble], diabetes mellitus, ictus [doble], enfermedad vascular, edad 65-74 años y sexo [mujer], CKD-EPI: *Chronic Kidney Disease Epidemiology Collaboration*, EPOC: enfermedad pulmonar obstructiva crónica, FEVI: fracción de eyección del ventrículo izquierdo, HAS-BLED: hipertensión, función renal/hepática anormal, ictus, antecedentes de hemorragia o predisposición a ella, labilidad de la razón internacional normalizada, edad mayor 65 años y toma concomitante de fármacos o alcohol, IBP: inhibidores de la bomba de protones, IECA: inhibidor de la enzima de conversión de la angiotensina.

**Tabla 2**

Localización de los sangrados en pacientes con y sin demencia en función de la terapia anticoagulante.

| Hemorragia     |               | Demencia [n = 221]<br>(30 sangrados, 13 mayores) |       |                    |       | No demencia [n = 3.328]<br>(485 sangrados, 208 mayores) |       |                     |       |
|----------------|---------------|--------------------------------------------------|-------|--------------------|-------|---------------------------------------------------------|-------|---------------------|-------|
| Localización   | Severidad     | ACO<br>[n = 133]                                 |       | No ACO<br>[n = 88] |       | ACO<br>[n = 2.389]                                      |       | No ACO<br>[n = 939] |       |
|                |               | Núm                                              | %     | Núm                | %     | Núm                                                     | %     | Núm                 | %     |
| Intracraneal   | Mayor + menor | 0                                                | 0%    | 0                  | 0%    | 58                                                      | 14,5% | 5                   | 5,8%  |
|                | Mayor         | 0                                                | 0%    | 0                  | 0%    | 58                                                      | 14,5% | 5                   | 5,8%  |
| Digestivo alto | Mayor + menor | 4                                                | 18,2% | 1                  | 12,5% | 38                                                      | 9,5%  | 10                  | 11,6% |
|                | Mayor         | 4                                                | 40,0% | 1                  | 33,3% | 34                                                      | 19,4% | 10                  | 30,3% |
| Digestivo bajo | Mayor + menor | 4                                                | 18,2% | 2                  | 25,0% | 95                                                      | 23,8% | 30                  | 34,9% |
|                | Mayor         | 3                                                | 30,0% | 0                  | 0,0%  | 46                                                      | 26,3% | 10                  | 30,3% |
| Genitourinario | Mayor + menor | 7                                                | 31,8% | 4                  | 50,0% | 77                                                      | 19,3% | 22                  | 25,6% |
|                | Mayor         | 2                                                | 20,0% | 1                  | 33,3% | 17                                                      | 9,7%  | 5                   | 15,2% |
| Broncopulmonar | Mayor + menor | 0                                                | 0%    | 0                  | 0,0%  | 3                                                       | 0,8%  | 2                   | 2,3%  |
|                | Mayor         | 0                                                | 0%    | 0                  | 0,0%  | 1                                                       | 0,6%  | 1                   | 3,0%  |

|                              |               |   |       |   |       |    |       |   |      |
|------------------------------|---------------|---|-------|---|-------|----|-------|---|------|
| <b>Otorrinolaringológico</b> | Mayor + menor | 1 | 4,5%  | 0 | 0,0%  | 63 | 15,8% | 5 | 5,8% |
|                              | Mayor         | 0 | 0,0%  | 0 | 0,0%  | 6  | 3,4%  | 1 | 3,0% |
| <b>Ocular</b>                | Mayor + menor | 0 | 0%    | 0 | 0,0%  | 12 | 3,0%  | 1 | 1,2% |
|                              | Mayor         | 0 | 0%    | 0 | 0,0%  | 3  | 1,7%  | 0 | 0,0% |
| <b>Vascular</b>              | Mayor + menor | 1 | 4,5%  | 0 | 0,0%  | 4  | 1,0%  | 2 | 2,3% |
|                              | Mayor         | 0 | 0,0%  | 0 | 0,0%  | 0  | 0,0%  | 0 | 0,0% |
| <b>Mucocutáneo</b>           | Mayor + menor | 3 | 13,6% | 0 | 0,0%  | 30 | 7,5%  | 8 | 9,3% |
|                              | Mayor         | 0 | 0,0%  | 0 | 0,0%  | 3  | 1,7%  | 1 | 3,0% |
| <b>Otros</b>                 | Mayor + menor | 2 | 9,1%  | 1 | 12,5% | 19 | 4,8%  | 1 | 1,2% |
|                              | Mayor         | 1 | 10,0% | 1 | 33,3% | 7  | 4,0%  | 0 | 0,0% |

**Tabla 3**

Análisis multivariado para mortalidad, embolias y sangrados.

| Variables              | MORTALIDAD<br>AUC: 0,85 ± 0,03 |       | EMBOLIAS<br>AUC: 0,78 ± 0,05 |       | SANGRADOS<br>AUC: 0,74 ± 0,05 |       |
|------------------------|--------------------------------|-------|------------------------------|-------|-------------------------------|-------|
|                        | HR<br>(IC95%)                  | p     | HR<br>(IC95%)                | p     | HR<br>(IC95%)                 | p     |
| Edad (por 1 año)       | 1,04<br>(0,98-1,11)            | 0,207 | 0,78<br>(0,65-0,94)          | 0,010 | 1,13<br>(1,01-1,27)           | 0,039 |
| Sexo femenino          | 0,44<br>(0,22-0,87)            | 0,018 | 0,71<br>(0,22-2,27)          | 0,562 | 0,37<br>(0,13-1,03)           | 0,054 |
| Hipertensión arterial  | 1,77<br>(0,81-3,86)            | 0,151 | -                            | -     | 1,13<br>(0,32-3,91)           | 0,857 |
| Diabetes               | 2,79<br>(1,18-6,59)            | 0,019 | -                            | -     | -                             | -     |
| Cardiopatía isquémica  | 1,90<br>(0,85-4,23)            | 0,117 | -                            | -     | -                             | -     |
| Insuficiencia cardiaca | 2,09<br>(0,99-4,40)            | 0,053 | -                            | -     | -                             | -     |

|                                                      |                      |         |                     |       |                      |       |
|------------------------------------------------------|----------------------|---------|---------------------|-------|----------------------|-------|
| Infarto cerebral previo                              | 3,40<br>(1,01-11,46) | 0,049   | 1,57<br>(0,36-6,80) | 0,544 | -                    | -     |
| Hemorragia previa                                    | 1,40<br>(0,56-3,49)  | 0,474   | -                   | -     | 1,46<br>(0,17-12,47) | 0,732 |
| Anemia                                               | 2,13<br>(1,19-3,82)  | 0,011   | -                   | -     | 2,13<br>(0,50-8,99)  | 0,305 |
| EPOC                                                 | 1,00<br>(0,53-1,89)  | 0,991   | -                   | -     | -                    | -     |
| FEVI ≤ 40%                                           | 1,26<br>(0,53-3,01)  | 0,605   | -                   | -     | -                    | -     |
| CKD-EPI (por 1 ml/min/1,73 m <sup>2</sup> )          | 0,99<br>(0,98-1,00)  | 0,209   | -                   | -     | -                    | -     |
| Fibrilación auricular de novo                        | 0,15<br>(0,06-0,37)  | < 0,001 | 0,27<br>(0,13-1,76) | 0,269 | 0,25<br>(0,06-1,12)  | 0,071 |
| CHA <sub>2</sub> DS <sub>2</sub> -VASc (por 1 punto) | 2,04<br>(1,21-3,46)  | 0,008   | 1,03<br>(0,60-1,76) | 0,925 | 1,09<br>(0,64-1,88)  | 0,744 |
| HAS-BLED (por 1 punto)                               | 0,96<br>(0,68-1,36)  | 0,830   | 0,82<br>(0,44-1,55) | 0,549 | 1,22<br>(0,65-2,29)  | 0,539 |

|                             |                                   |              |                                   |              |                                   |              |
|-----------------------------|-----------------------------------|--------------|-----------------------------------|--------------|-----------------------------------|--------------|
| <b>Anticoagulación oral</b> | <b>1,04</b><br><b>(0,63-1,72)</b> | <b>0,880</b> | <b>0,36</b><br><b>(0,15-0,84)</b> | <b>0,018</b> | <b>2,44</b><br><b>(1,04-5,71)</b> | <b>0,041</b> |
| Antiagregación              | 1,46<br>(0,81-2,60)               | 0,206        | 1,08<br>(0,30-3,87)               | 0,904        | 0,64<br>(0,14-2,92)               | 0,560        |
| Digoxina                    | 1,35<br>(0,84-2,16)               | 0,210        | 1,29<br>(0,39-4,27)               | 0,681        | -                                 | -            |
| IECA/ARA-II                 | -                                 | -            | 1,26<br>(0,52-3,02)               | 0,612        | 1,03<br>(0,44-2,44)               | 0,942        |
| Estatinas                   | 1,28<br>(0,74-2,21)               | 0,378        | -                                 | -            | -                                 | -            |
| IBP (%)                     | 1,04<br>(0,69-1,57))              | 0,859        | 2,03<br>(0,73-5,62)               | 0,173        | 0,69<br>(0,28-1,69)               | 0,413        |

ARA-II: antagonista del receptor de la angiotensina II, CHA<sub>2</sub>DS<sub>2</sub>-VAsC, insuficiencia cardiaca congestiva, hipertensión, edad ≥ 75 años [doble], diabetes mellitus, ictus [doble], enfermedad vascular, edad 65-74 años y sexo [mujer], CKD-EPI: *Chronic Kidney Disease Epidemiology Collaboration*, EPOC: enfermedad pulmonar obstructiva crónica, FEVI: fracción de eyección del ventrículo izquierdo, HAS-BLED: hipertensión, función renal/hepática anormal, ictus, antecedentes de hemorragia o predisposición a ella, labilidad de la razón internacional normalizada, edad mayor 65 años y toma concomitante de fármacos o alcohol, IBP: inhibidores de la bomba de protones, IC95%: intervalo de confianza del 95%, IECA: inhibidor de la enzima de conversión de la angiotensina.

**Figura 1**

Tratamiento anticoagulante inicial y tras cambios en el seguimiento de los pacientes  $\geq 85$  años con fibrilación auricular, en función de la presencia o no de demencia. ACOD: Anticoagulante de Acción Directa; AVK: Antagonista de la Vitamina K.

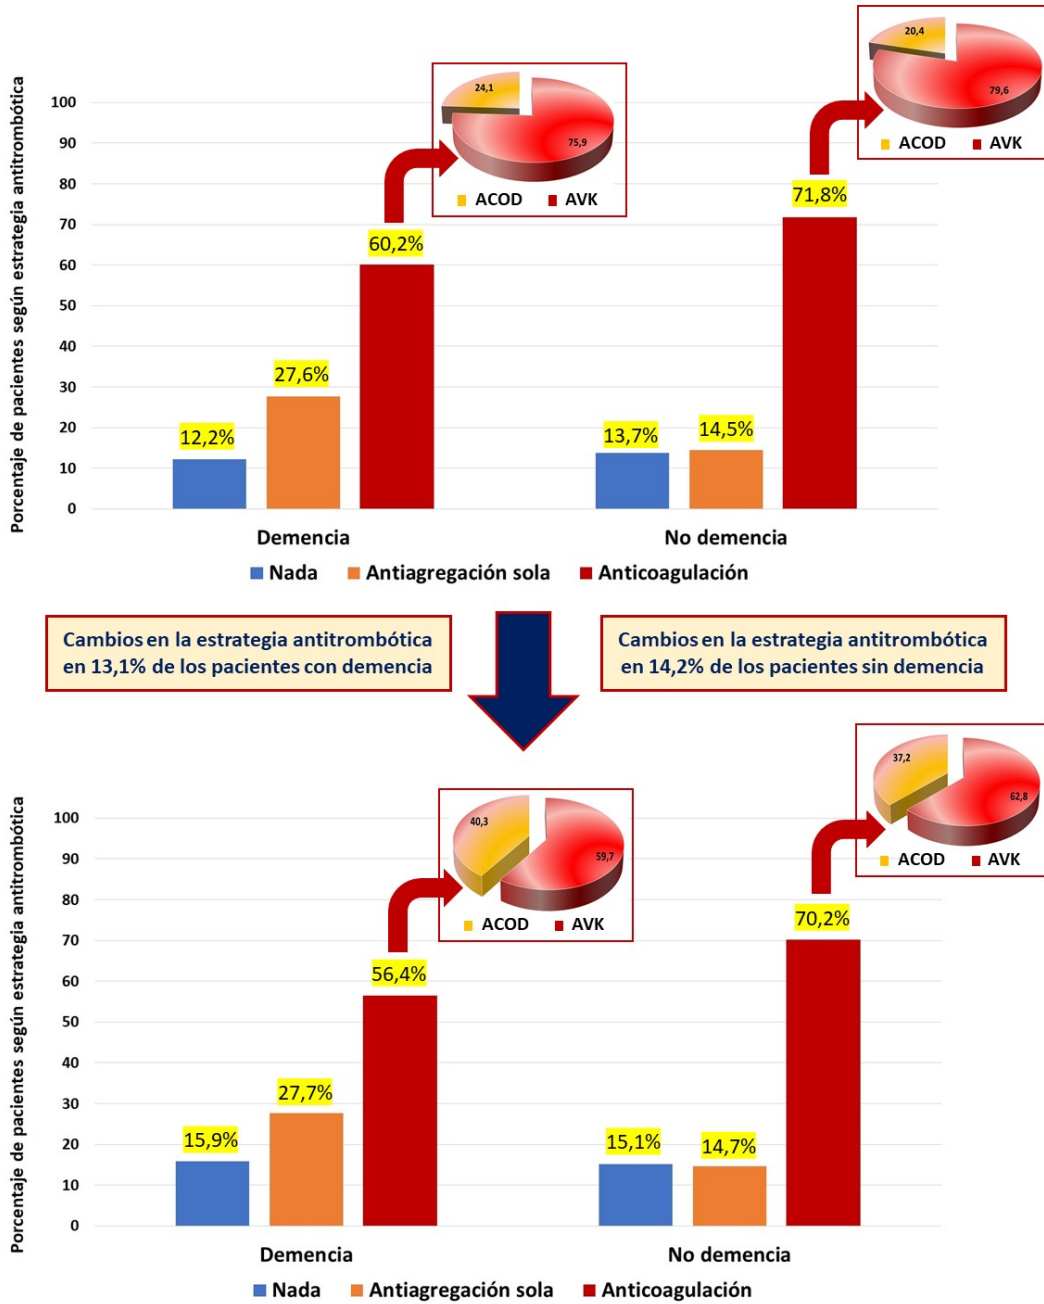



**Figura 2**

Flujo de seguimiento los pacientes con demencia tratados inicialmente con anticoagulación.

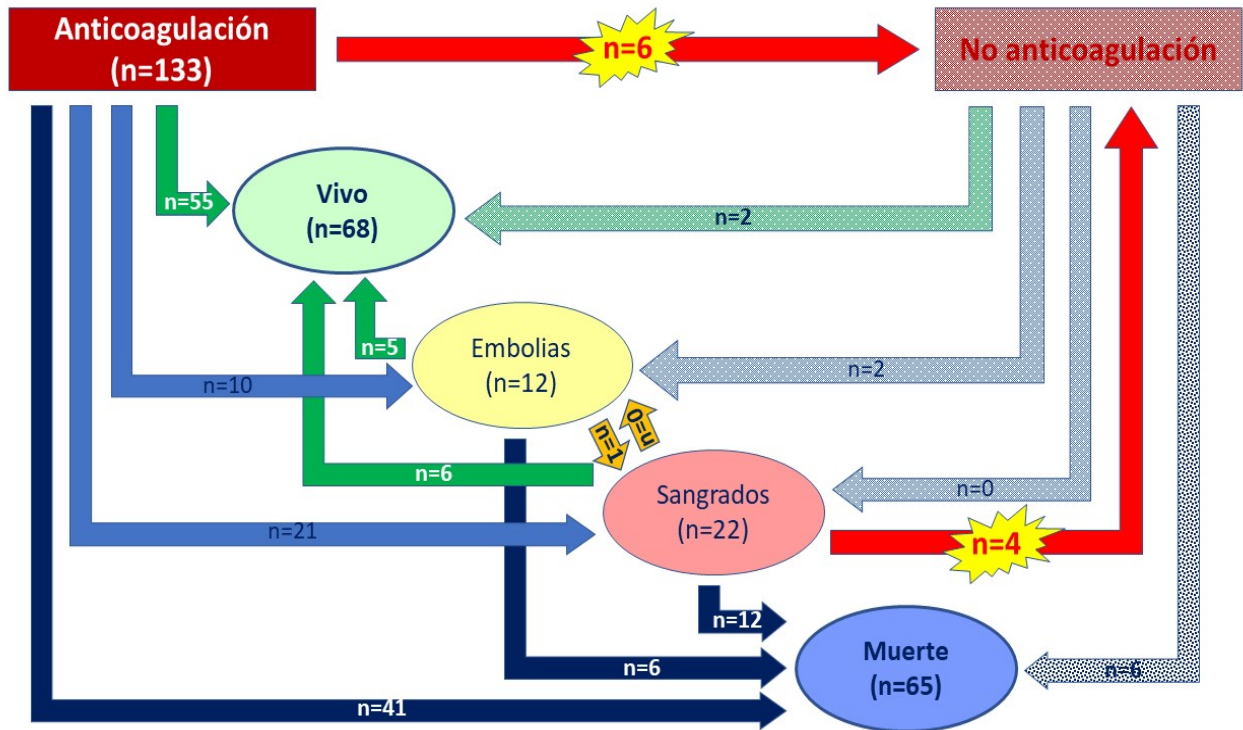

**Figura 3**

Flujo de seguimiento los pacientes con demencia tratados inicialmente sin anticoagulación.

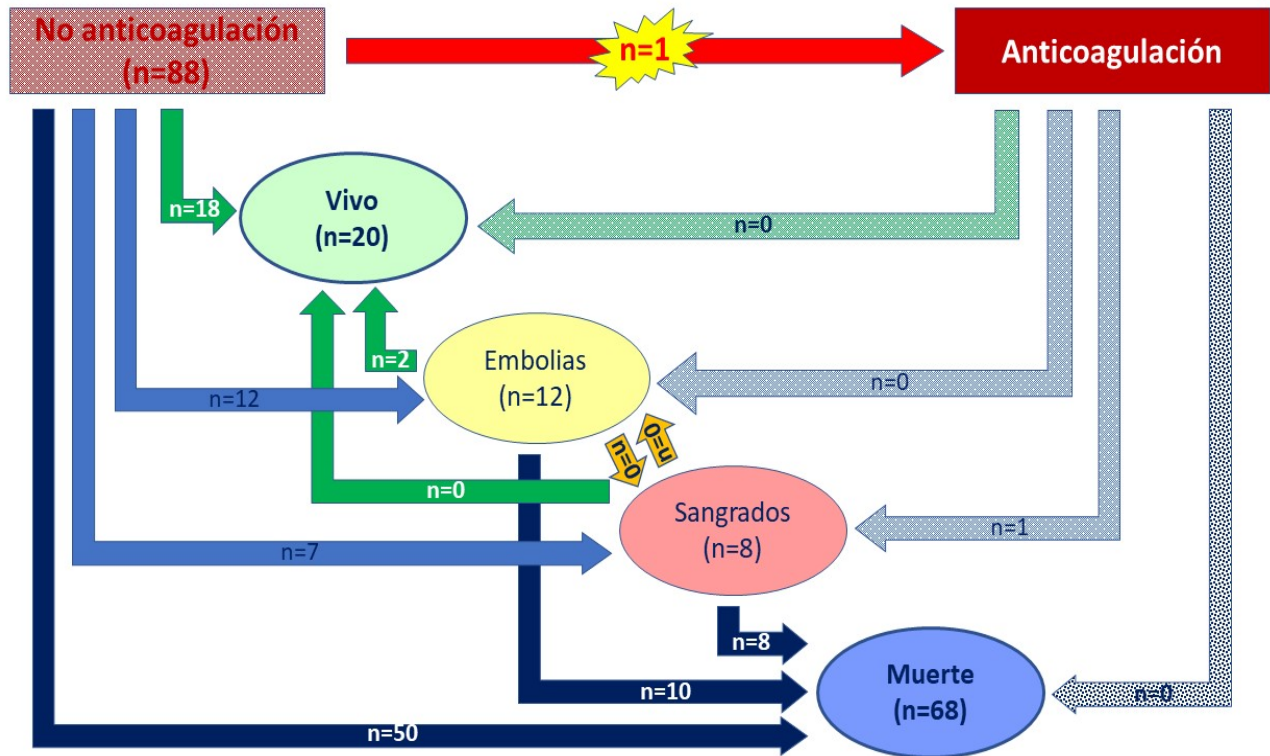

Supplement: mmc1 [file mmc1.pdf]
